# Supplementary material
Source: PubMed Central journal article supplement (PMC10041049)
Supplement: sj-pdf-1-ebm-10.1177_15353702221128573.pdf [file sj-pdf-1-ebm-10.1177_15353702221128573.pdf]

## **Supplementary Information**

**CX3CR1 deficiency exacerbates immune-mediated hepatitis by increasing NF- $\kappa$ B-mediated cytokine production in macrophage and T cell**

Mi et al.

## Supplementary Figure1

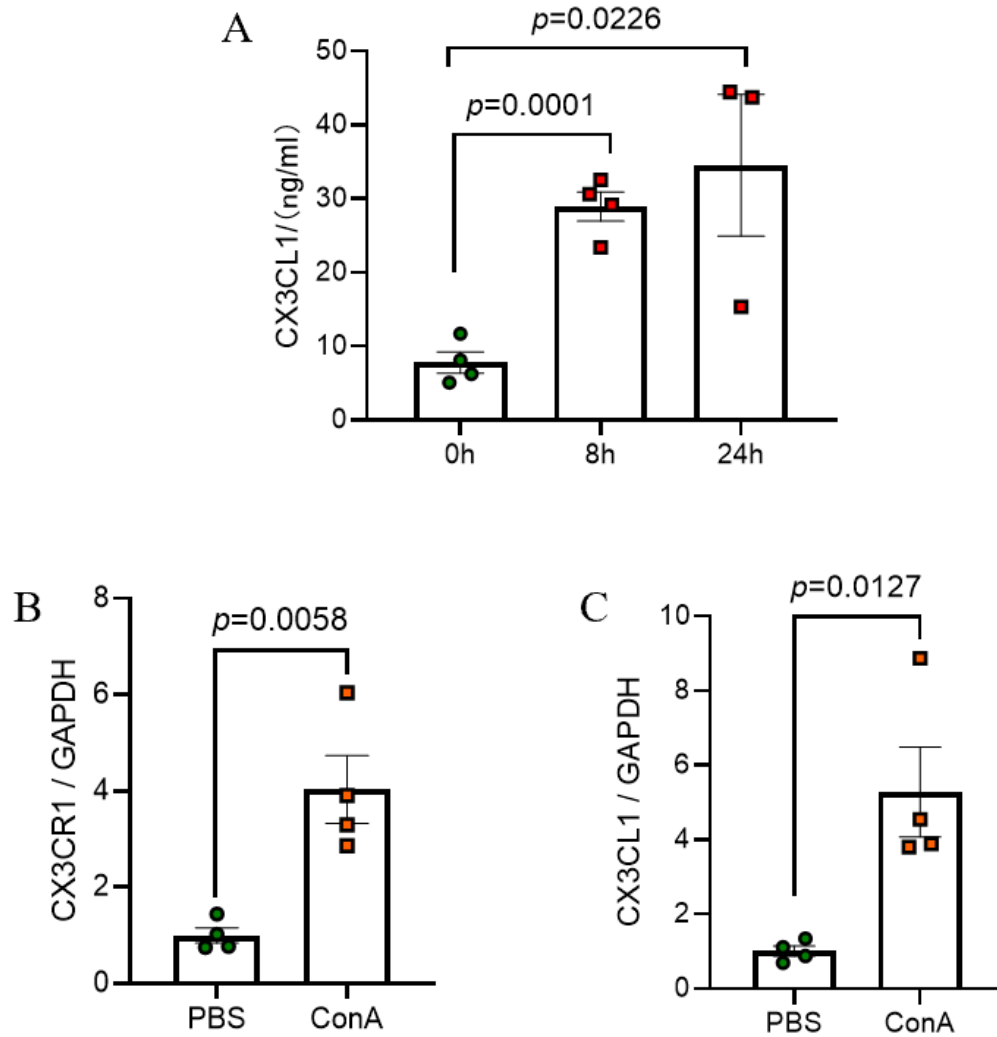

**Supplementary Figure1. Serum level of CX3CL1.** 15mg/kg body weight ConA were injected in 8 weeks C57BL/6J mice. Serum levels of CX3CL1(A) were measured by ELISA kit, and mRNA level of CX3CL1(B) and CX3CR1(C) were measured by RT-PCR at 8 hours after injection.

## BMDMs

Age-matched and sex-matched *Cx3cr1*<sup>+/+</sup> and *Cx3cr1*<sup>+/+</sup> mice were euthanized by CO<sub>2</sub>. Separate tibiae and femurs carefully, Cut the top end with sterile scissor, flushed the bone marrow with PBS into a sterile tube. Remove red blood cells with 5ml 1x red blood cell Lysis Solution. Adjust the cell density to 2 x 10<sup>6</sup> cells/ml in DMEM contain 20ng/ml CSF-1(PEPROTECH, 315-02). Seed bone marrow cells in 10cm petri dish, incubate at 37°C in 5% CO<sub>2</sub> atmosphere. On the next day, Add more 5ml differentiation medium in each dish. The bone marrow derived macrophage was ready on day 7.

## Resveratrol treatment before ConA

Resveratrol (Sigma-Aldrich) was dissolved in dimethyl sulfoxide (DMSO) at 200mg/ml, and store in 4°C. To inhibit the phosphorylation of NF-KB p65, mice was gavaged with resveratrol 30ug per g body weight per day, for 7 days before ConA. Mice was injected with 13 mg/ body weight ConA immediately after the last dose resveratrol, and sacrificed at 24 hours after ConA. Low dose ConA here to reduced mortality.

**Supplementary Table 1. Antibodies for flow cytometry**

| Antibody      | Clone    | Cat Number | Company     |
|---------------|----------|------------|-------------|
| CD45-FITC     | 30-F11   | 11-0451-82 | eBioscience |
| CD45-e450     | 30-F11   | 48-0451-82 | eBioscience |
| CD11b-PE-Cy7  | M1/70    | 25-0112-81 | eBioscience |
| Ly6C-e450     | HK1.4    | 48593282   | eBioscience |
| Ly6G-APC      | 1A8-Ly6g | 17-9668-80 | eBioscience |
| CD11c-PE      | N418     | 12-0114-81 | eBioscience |
| CD3-APC       | 17A2     | 17003282   | eBioscience |
| CD4-e605      | RM4-5    | 83-0042-42 | eBioscience |
| CD8-e450      | 53-6.7   | 48-0081-82 | eBioscience |
| NK1.1- FITC   | PK136    | 11-5941-85 | eBioscience |
| NK1.1         | PK136    | 108713     | Biolegend   |
| CD1d-PE       | 1B1      | 12-0011-82 | eBioscience |
| CCR2-APC      | SA203G11 | 150627     | Biolegend   |
| CX3CR1-FITC   | SA011F11 | 149019     | Biolegend   |
| CD11b- PE-Cy7 | M1/70    | 25-0112-81 | eBioscience |
| CD19-PE       | 6D5      | 115507     | Biolegend   |
| F4/80-e605    | BM8      | 123133     | Biolegend   |
